# Supplementary material
Source: ML conference proceedings conference paper supplement (https://openaccess.thecvf.com/content/ICCV2023/html/Qiao_Multi-view_Spectral_Polarization_ICCV_2023_paper.html)
Supplement: Supplementary file 1 [file Qiao_Multi-view_Spectral_Polarization_ICCV_2023_supplemental.zip]

# Multi-view Spectral Polarization Propagation for Video Glass Segmentation (Supplementary Material)

Anonymous ICCV submission

Paper ID 6969

This supplementary document provides more details of the proposed PGV-117 dataset (§ 1), the formal definitions of the four quantitative metrics (§ 2), and the detailed calculation of key affinity (§ 3). Five processed video sequences are provided along with this document. The teaser and the visual results shown in section 5.2 of this submission are from these five videos. We also offer additional video results through [Google Drive](#).

## 1. PGV-117 Dataset

The ground truth masks of the proposed PGV-117 dataset are annotated by annotation professionals, resulting in 144, 686 glass masks. Each ground truth mask is manually checked to ensure the quality of the annotations.

The proposed dataset consists of 117 sequences and 21, 485 frames. The training set offers 85 sequences, 15, 838 frames, and the testing set provides 32 sequences, 5, 647 frames. [Figure 1](#) and [Figure 2](#) show the number of frames for each sequence in the training and testing set, respectively.

## 2. Formal Definition of Evaluation Metrics

We adopt the four metrics used by Mei *et al.* [5] for evaluating all competing approaches, which are intersection over union (IoU), weighted F-measure ( $F_\beta$ ) [4], mean absolute error (MAE), and balance error rate (BER) [6]. Here, we provide the formal definitions of these four metrics.

### Intersection over union (IoU)

$$IoU = \frac{\sum_{i=1}^H \sum_{j=1}^W (G(i, j) * P_b(i, j))}{\sum_{i=1}^H \sum_{j=1}^W (G(i, j) + P_b(i, j) - G(i, j) * P_b(i, j))}, \quad (1)$$

where  $G$  is the ground truth mask in which the values of the glass region are 1 while those of the non-glass region are 0;  $P_b$  is the predicted mask binarized with a threshold of 0.5; and  $H$  and  $W$  are the height and width of the ground truth mask, respectively.

**Weighted F-measure ( $F_\beta$ )** takes a prediction map's precision and recall into account, which is a common metric used in salient object detection tasks. Based on recent studies [2, 3], the weighted F-measure [4] is more reliable than the traditional  $F_\beta$  [5], and it is used in our evaluation.

**Mean Absolute Error (MAE)** calculates the element-wise distance between a prediction map  $P$  and the corresponding ground truth mask  $G$ :

$$MAE = \frac{1}{H \times W} \sum_{i=1}^H \sum_{j=1}^W |P(i, j) - G(i, j)| \quad (2)$$

where  $P(i, j)$  indicates the predicted probability score at location  $(i, j)$ .

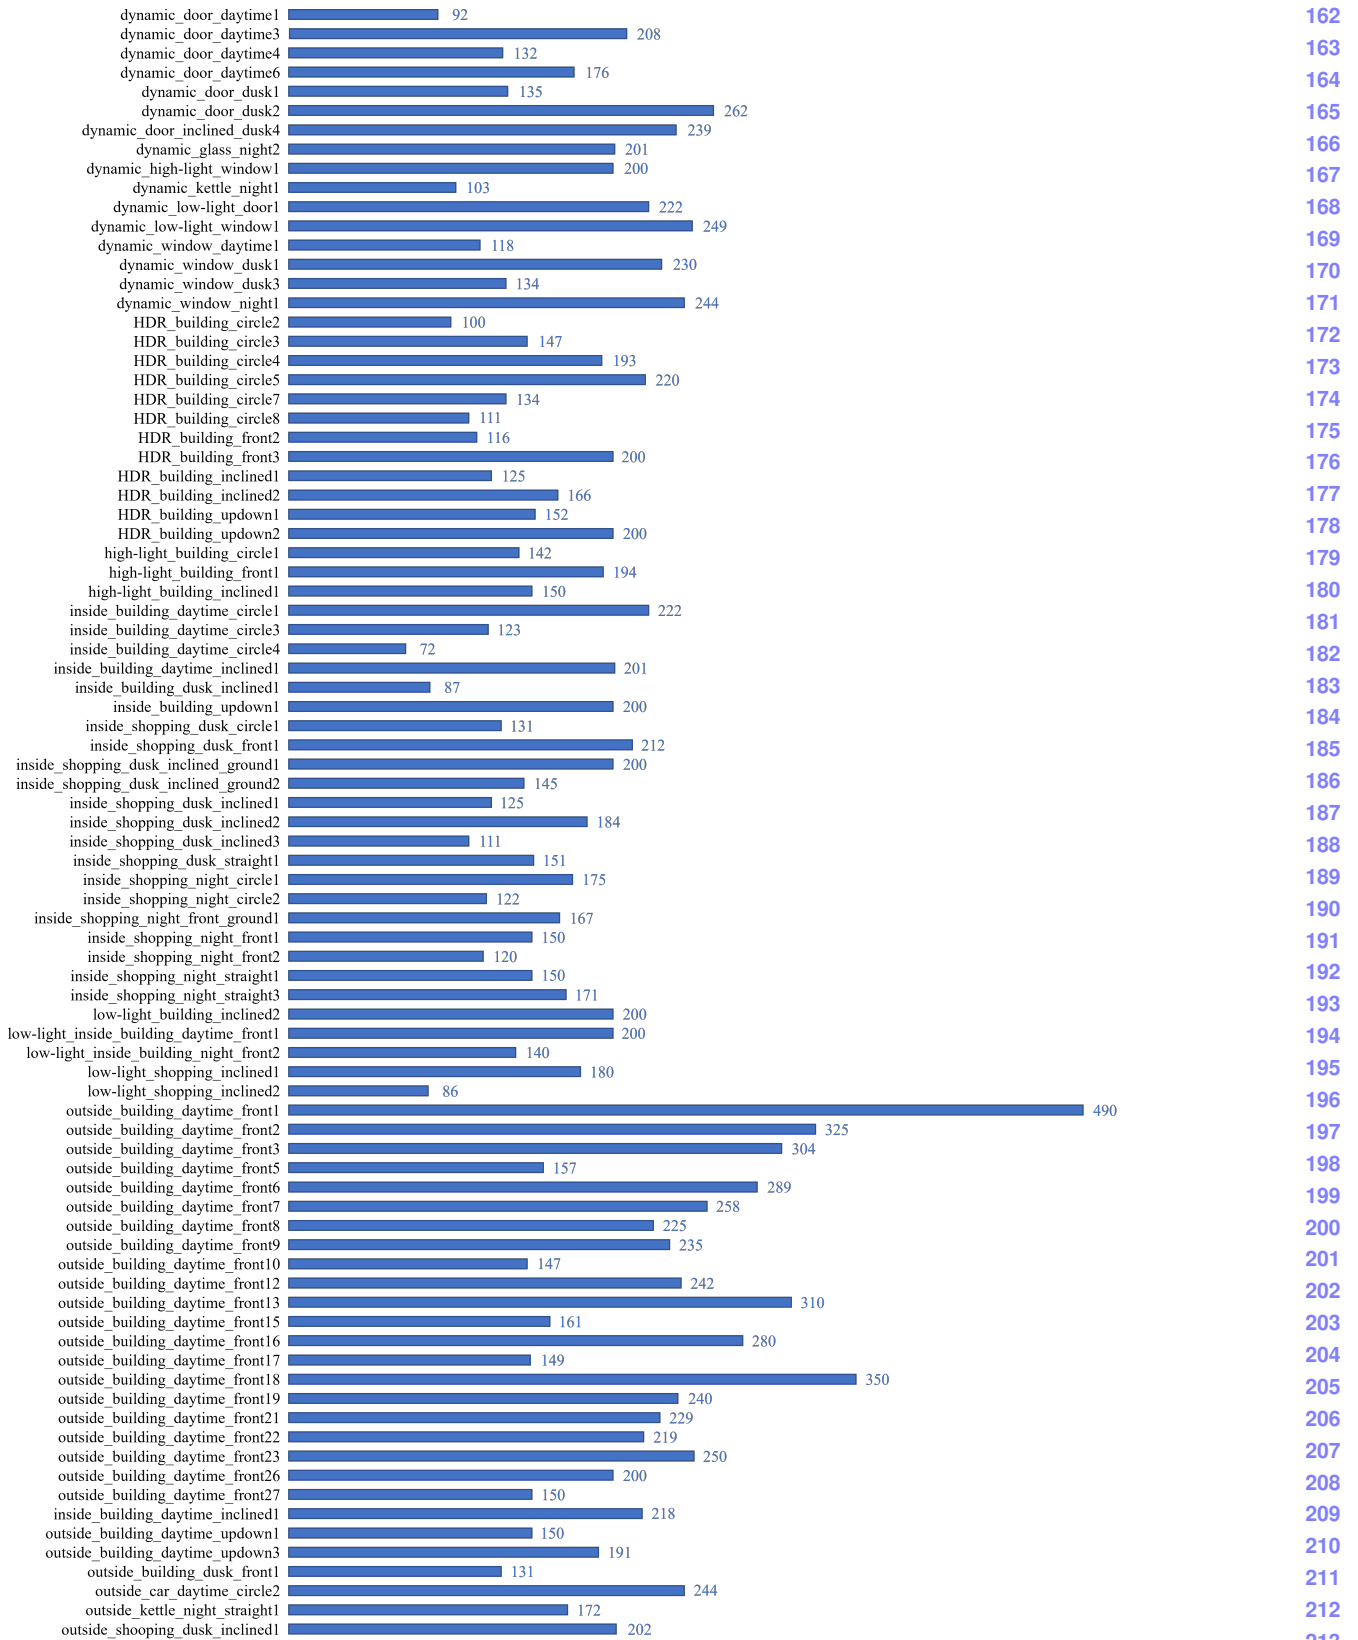

Figure 1. Summary for training set distribution of PGV-117, which includes 85 video sequences in total.

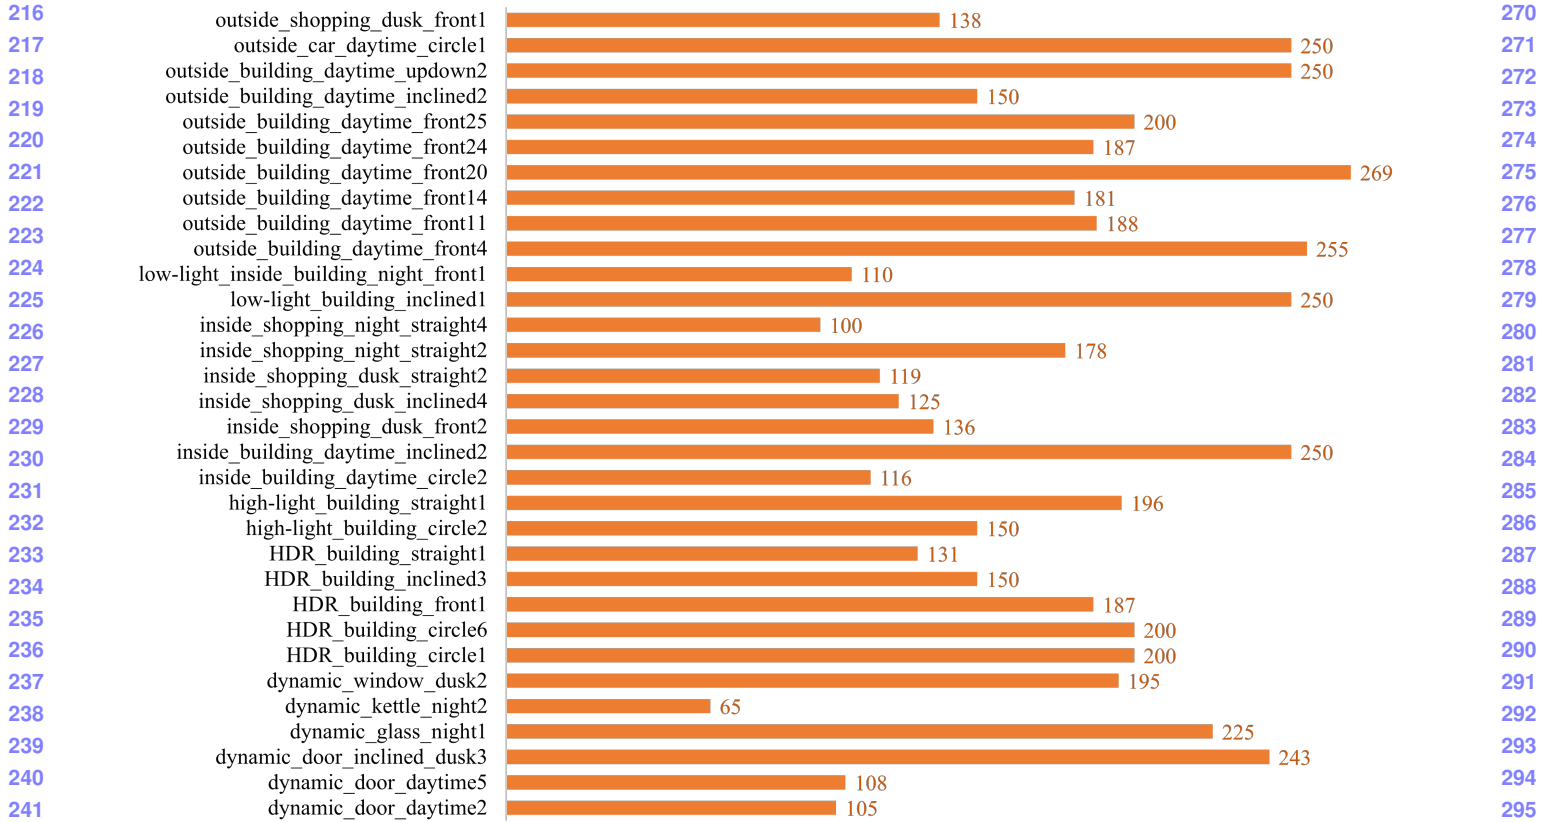

Figure 2. Summary for testing set distribution of PGV-117, which includes 32 video sequences in total. In order not to lose generality, all lighting conditions, camera motion patterns, and dynamics are also included in the testing set.

**Balance error rate (BER)** is a common metric used in shadow detection tasks. Formally, it is defined as:

$$BER = (1 - \frac{1}{2}(\frac{TP}{N_p} + \frac{TN}{N_n})) \times 100 \quad (3)$$

where  $TP$ ,  $TN$ ,  $N_p$ , and  $N_n$  represent the numbers of true positive pixels, true negative pixels, glass pixels, and non-glass pixels, respectively.

### 3. Computing Affinity

For the query frame  $t$ , we relate multi-view RGB-P information by exploring the relationship between the PGI key of  $t$  with the keys in the memory (0 to  $t - 1$ ). After generating the query key  $k^Q$  and memory keys  $k^M$ , we refer to [7, 1] to calculate the affinity between  $k^Q$  and  $k^M$ :

$$\begin{aligned} a &= \xi[(k^M)^2], \\ b &= 2 * [(k^M)^T \otimes k^Q], \\ A &= (-a + b) / \sqrt{CK}, \\ A &= \frac{\exp(A_{ij})}{\sum_n (\exp(A_{nj}))}. \end{aligned} \quad (4)$$

where  $\xi[\cdot]$  represents the summation and unsqueeze operation,  $\otimes$  means matrix multiplication.  $CK$  is the number of channels for the key features, and  $i$  denotes the affinity value at the  $i$ -th position. The affinity considers both RGB similarity and multi-view spectral consistency between the query and memory frames. The value encoder output  $v^M$  corresponding to  $k^M$  contains features from the tripartite memory values, and the multiplication of affinity and  $v^M$  correlates the query frame and historical information to obtain  $v^Q$  to participate in the readout of the memory bank.

324  
325  
326  
327  
328  
329  
330  
331  
332  
333  
334  
335  
336  
337  
338  
339  
340  
341  
342  
343  
344  
345  
346  
347  
348  
349  
350  
351  
352  
353  
354  
355  
356  
357  
358  
359  
360  
361  
362  
363  
364  
365  
366  
367  
368  
369  
370  
371  
372  
373  
374  
375  
376  
377

**References**

[1] Ho Kei Cheng, Yu-Wing Tai, and Chi-Keung Tang. Rethinking space-time networks with improved memory coverage for efficient video object segmentation. In *NeurIPS*, 2021. 3

[2] Deng-Ping Fan, Ming-Ming Cheng, Yun Liu, Tao Li, and Ali Borji. Structure-measure: A new way to evaluate foreground maps. In *ICCV*, 2017. 1

[3] Deng-Ping Fan, Cheng Gong, Yang Cao, Bo Ren, Ming-Ming Cheng, and Ali Borji. Enhanced-alignment measure for binary foreground map evaluation. In *IJCAI*, 2018. 1

[4] Ran Margolin, Lih Zelnik-Manor, and Ayellet Tal. How to evaluate foreground maps? In *CVPR*, 2014. 1

[5] Haiyang Mei, Bo Dong, Wen Dong, Jiayi Yang, Seung-Hwan Baek, Felix Heide, Pieter Peers, Xiaopeng Wei, and Xin Yang. Glass segmentation using intensity and spectral polarization cues. In *CVPR*, 2022. 1

[6] Vu Nguyen, Tomas F Yago Vicente, Maozheng Zhao, Minh Hoai, and Dimitris Samaras. Shadow detection with conditional generative adversarial networks. In *ICCV*, 2017. 1

[7] Seoung Wug Oh, Joon-Young Lee, Ning Xu, and Seon Joo Kim. Video object segmentation using space-time memory networks. In *ICCV*, 2019. 3

378  
379  
380  
381  
382  
383  
384  
385  
386  
387  
388  
389  
390  
391  
392  
393  
394  
395  
396  
397  
398  
399  
400  
401  
402  
403  
404  
405  
406  
407  
408  
409  
410  
411  
412  
413  
414  
415  
416  
417  
418  
419  
420  
421  
422  
423  
424  
425  
426  
427  
428  
429  
430  
431
